# Supplementary material for: Charge transfer aided selective sensing and capture of picric acid by triphenylbenzenes
Source: Royal Society of Chemistry journal article supplement (doi:10.1039/c4nj01093k), 2014-09-18
Supplement: c4nj01093k1.pdf [file c4nj01093k1.pdf]

Electronic Supporting Information

**Charge Transfer Aided Selective Sensing and Capture of Picric Acid by  
Triphenylbenzenes**

Pratap Vishnoi, Saumik Sen, G. Naresh Patwari,\* and Ramaswamy Murugavel\*

Department of Chemistry,  
Indian Institute of Technology Bombay, Mumbai, India-400 076

G. Naresh Patwari

E-mail; [naresh@chem.iitb.ac.in](mailto:naresh@chem.iitb.ac.in),

Ramaswamy Murugavel

[rmv@chem.iitb.ac.in](mailto:rmv@chem.iitb.ac.in)

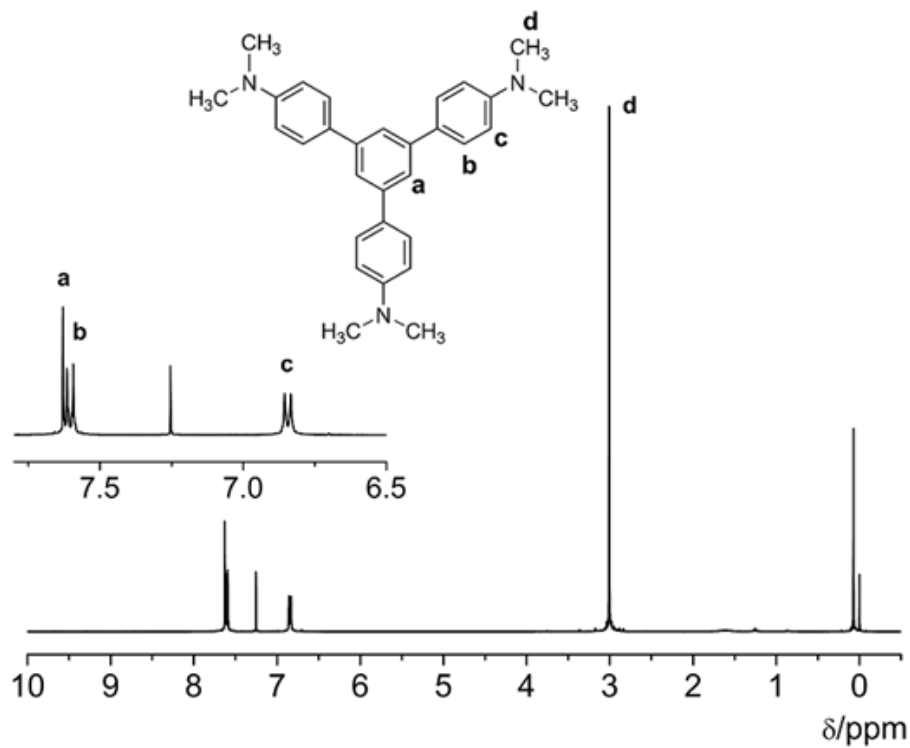

**Fig S1.**  $^1H$  NMR spectrum of  $[(N,N)Me_2]_3$ -TAPB in  $CDCl_3$ .

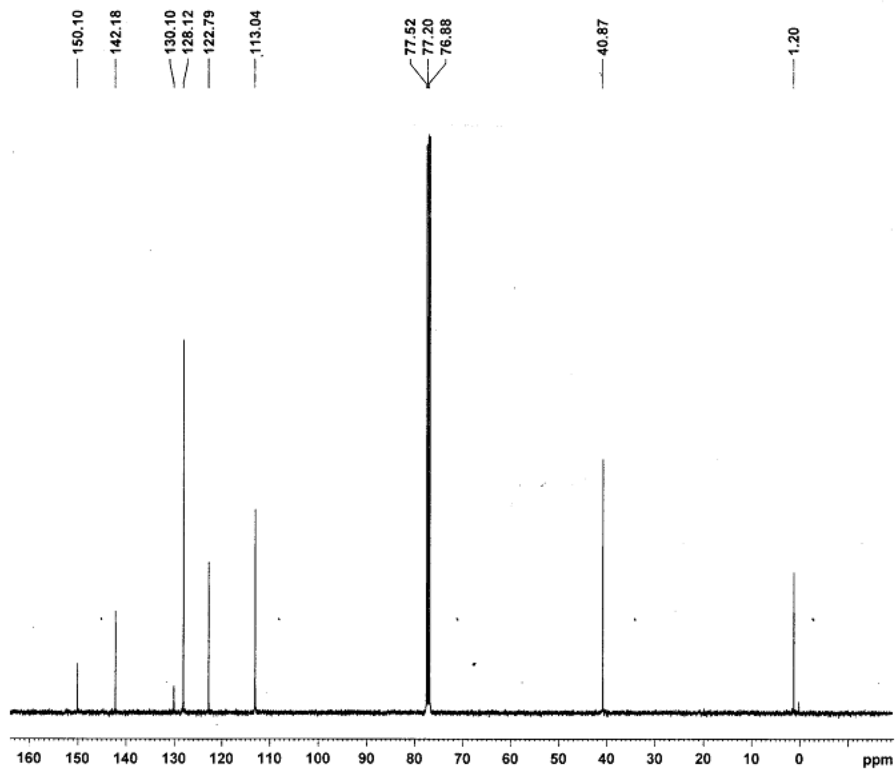

**Fig S2.**  $^{13}C$  NMR spectrum of  $[(N,N)Me_2]_3$ -TAPB in  $CDCl_3$ .

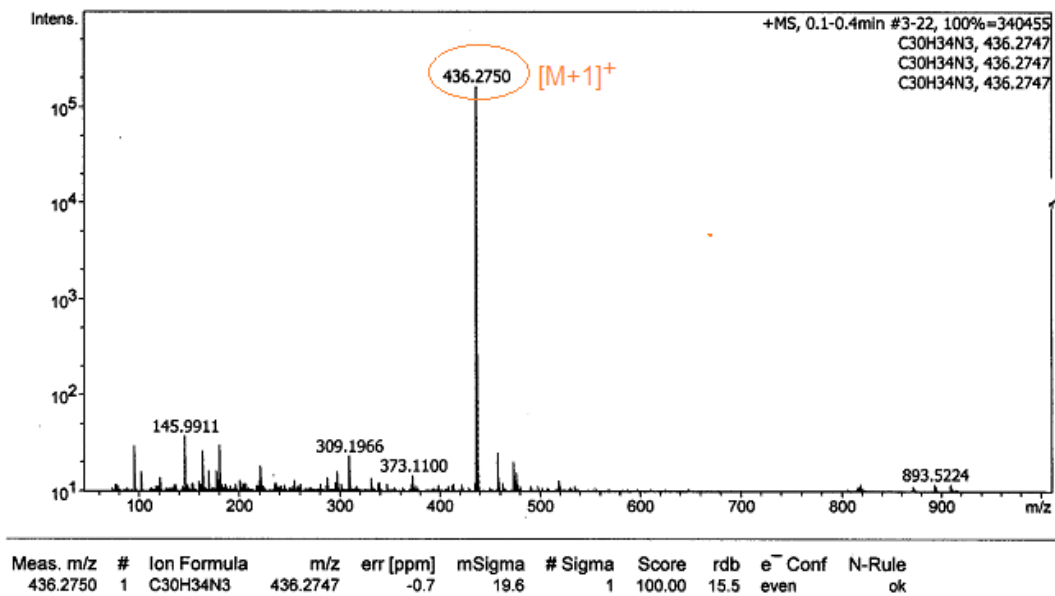

**Fig S3.** ESI-MS spectrum of  $[(N,N)Me_2]_3$ -TAPB.

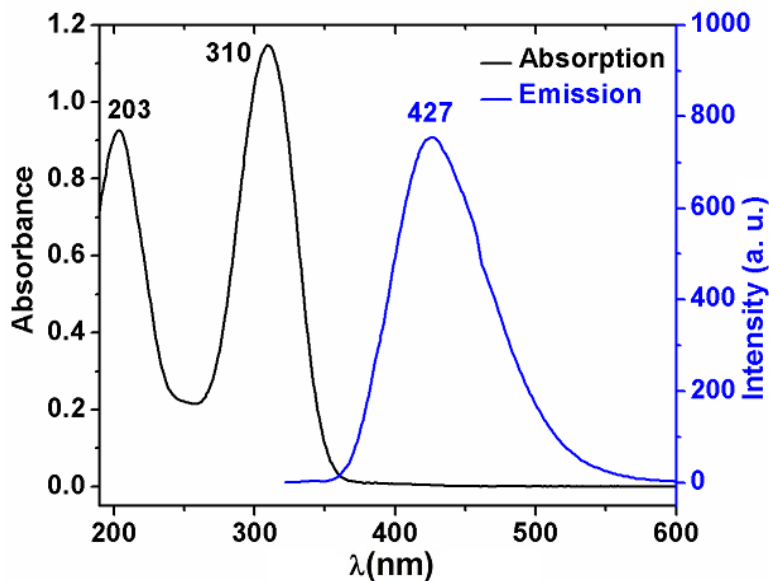

**Fig S4.** UV-Vis absorption spectrum ( $10 \mu\text{M}$ ;  $\lambda_{\text{max}} = 203 \text{ nm}$  ( $\epsilon = 8 \times 10^4 \text{ M}^{-1}\text{cm}^{-1}$ );  $\lambda_{\text{max}} = 310 \text{ nm}$  ( $\epsilon = 1.1 \times 10^5 \text{ M}^{-1}\text{cm}^{-1}$ ) and emission spectrum ( $1.0 \mu\text{M}$ ,  $\lambda_{\text{ex}} = 310 \text{ nm}$  and  $\lambda_{\text{em}} = 425 \text{ nm}$ ) of  $[(N,N)Me_2]_3$ -TAPB.

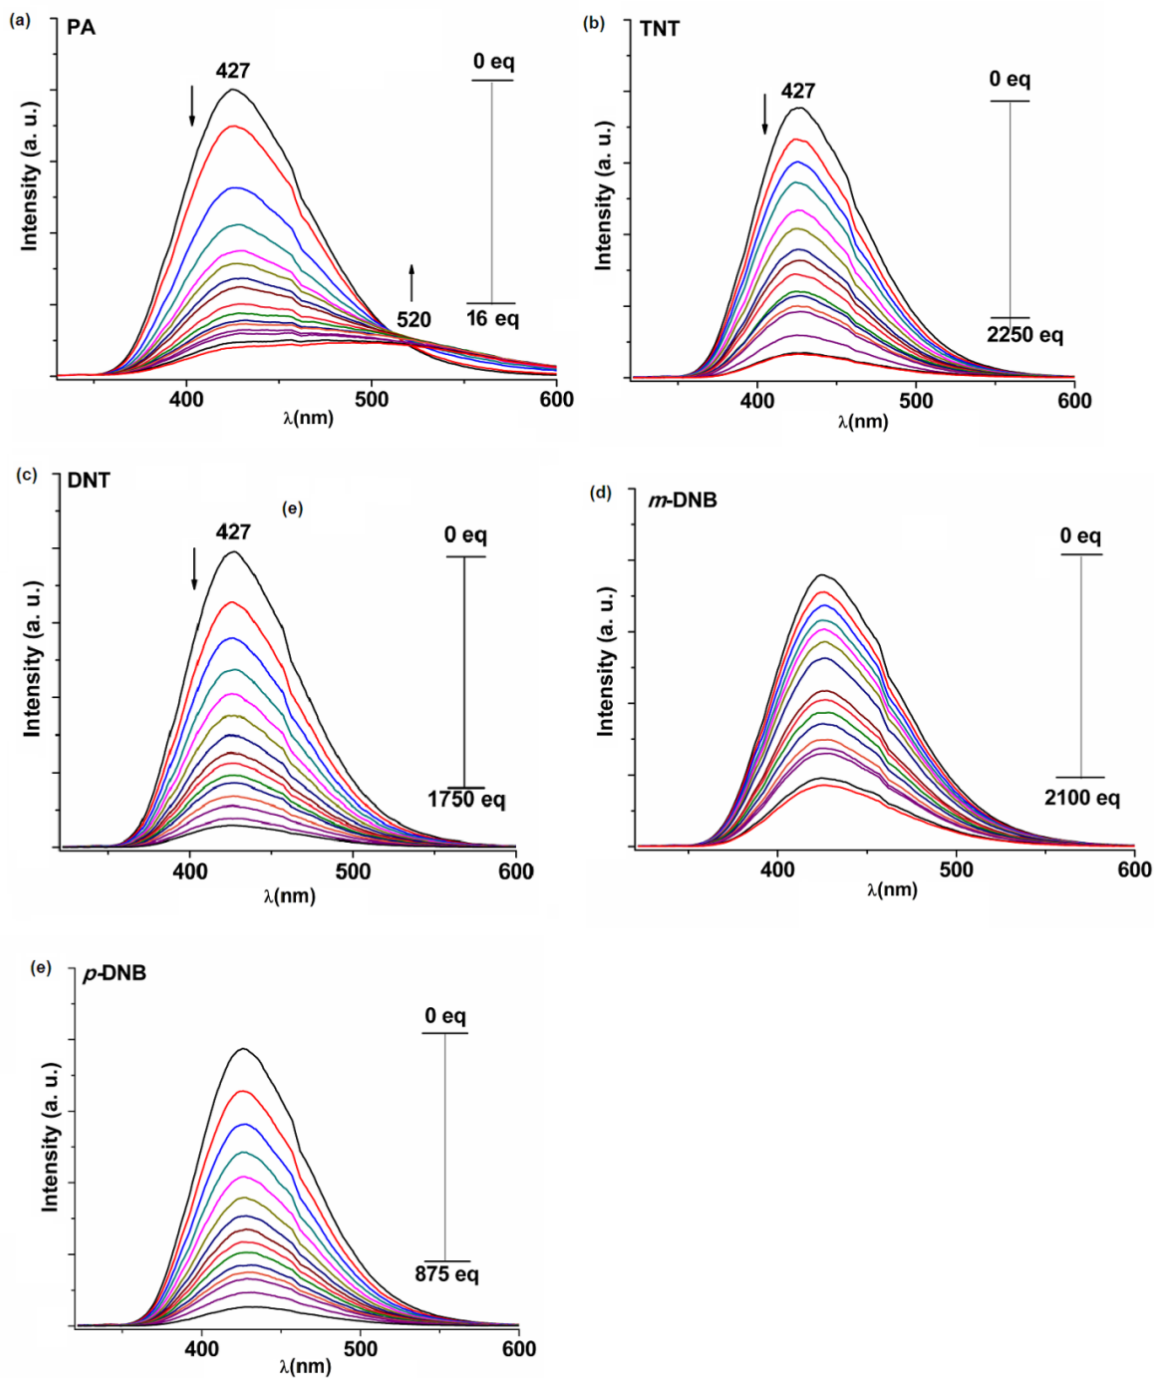

**Fig S5.** Fluorescence quenching profiles of  $[(N,N)Me_2]_3$ -TAPB in acetonitrile (1.0  $\mu$ M) with various concentrations of PNAC analytes, (a) with PA, (b) with TNT, (c) with DNT, (d) with *m*-DNB and (e) with *p*-DNB.

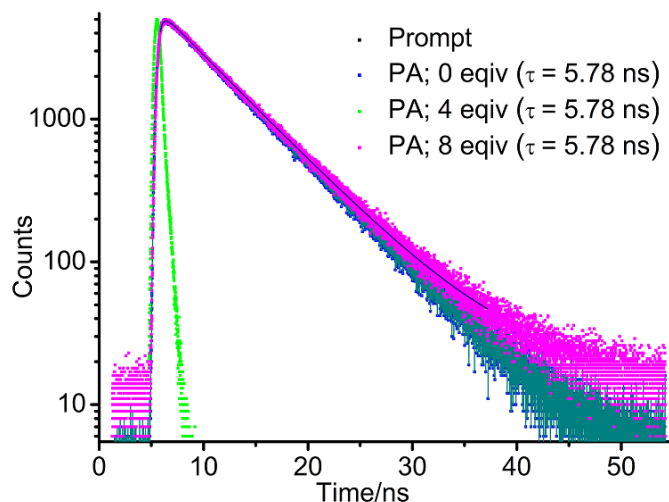

**Fig S6.** Time resolved fluorescence decays for an acetonitrile solution of  $[(N,N)Me_2]_3$ -TAPB before and after multiple additions of known concentrations of PA.

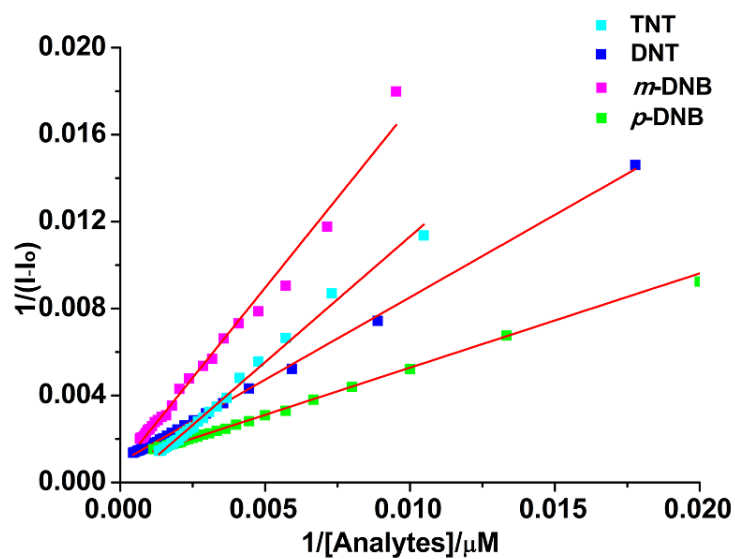

**Fig S7.** Benesi-Hildebrand plots of  $[(N,N)Me_2]_3$ TAPB with TNT, DNT, *m*-DNB and *p*-DNB.

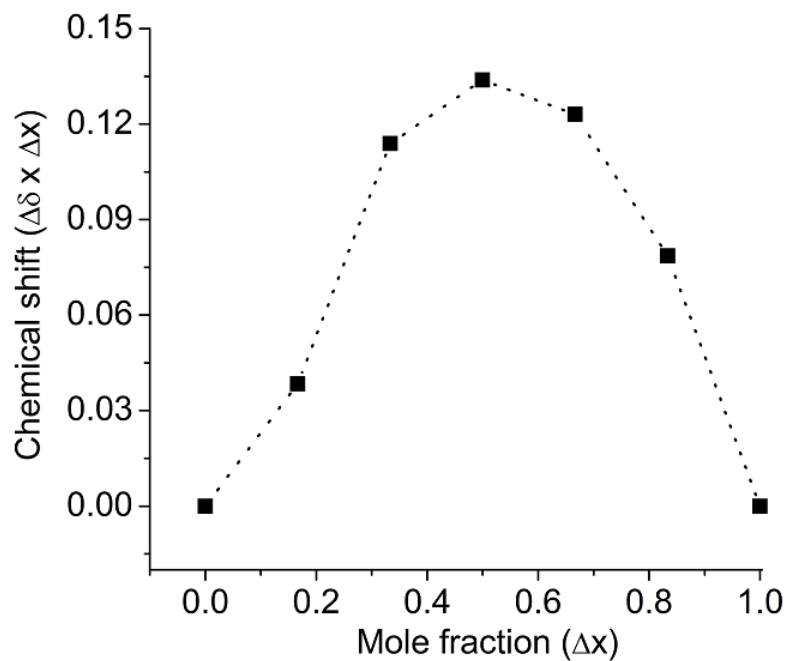

**Fig S8.** Job's plot of  $[(N,N)Me_2]_3TAPB$  with PA showing complexation in 1:1 stoichiometry.

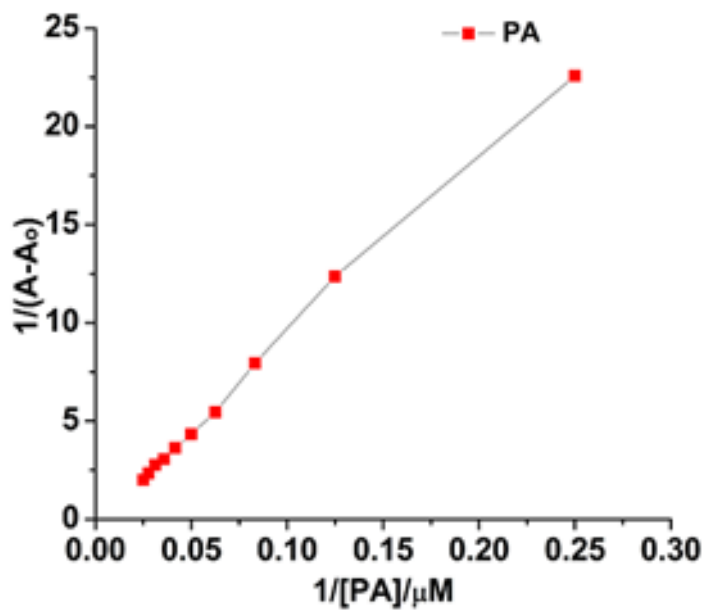

**Fig S9.** Benesi-Hildebrand plots of  $[(N,N)Me_2]_3-TAPB$  with PA obtained from UV-Vis absorption titration.

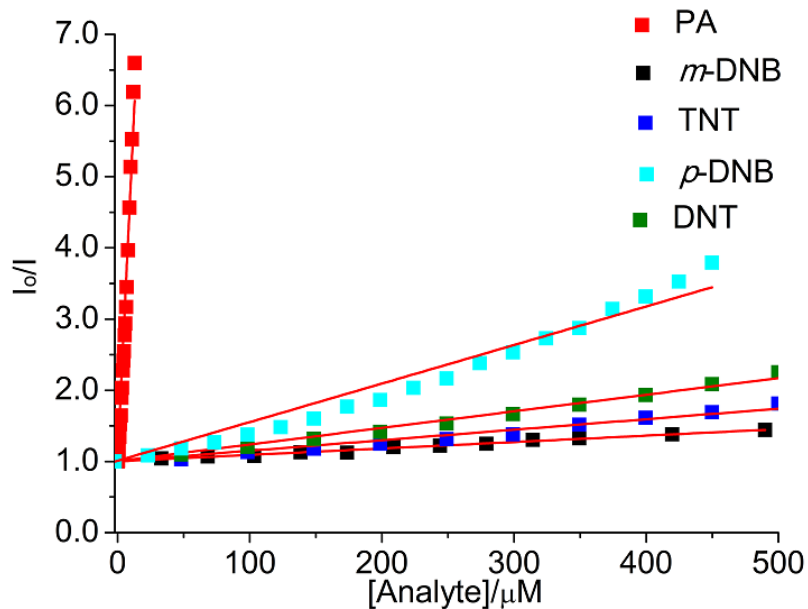

**Fig S10.** The Stern-Volmer plots of [(N,N)Me<sub>2</sub>]<sub>3</sub>TAPB obtained from fluorescence quenching titration of different PNAC analytes (PA, TNT, DNT, *m*-DNB and *p*-DNB).

**Table S1.** Details of quenching efficiencies for [(N,N)Me<sub>2</sub>]<sub>3</sub>-TAPB with various concentrations of different PNAC analytes.

| Analyte(s)    | Equivalent(s) added | % Quenching | $K_{sv}$ (M <sup>-1</sup> ) |
|---------------|---------------------|-------------|-----------------------------|
| PA            | 8                   | 75          | $3.31 \times 10^5$          |
| TNT           | 2250                | 90          | $1.90 \times 10^3$          |
| <i>m</i> -DNB | 2100                | 77          | $3.03 \times 10^3$          |
| DNT           | 1720                | 92          | $1.23 \times 10^3$          |
| <i>p</i> -DNB | 875                 | 93          | $5.44 \times 10^3$          |

**Table S2.** Comparison of present results with previously reported PA sensors.

| Chemo-sensor                           | $K_{sv}$ ( $M^{-1}$ )                                                                                                                                       | Detection Limit   | Analyte                                                   | Solvent            | Ref       |
|----------------------------------------|-------------------------------------------------------------------------------------------------------------------------------------------------------------|-------------------|-----------------------------------------------------------|--------------------|-----------|
| hexaphenylsilole                       | -                                                                                                                                                           | 4.81 ppb          | Only PA                                                   | THF/water or water | 1         |
| tetraphenylethene                      | $2.7 \times 10^5$                                                                                                                                           | 0.4 ppm           | Only PA                                                   | water              | 2         |
| trigonal-prismatic cages               | Ru(III)<br>PA; $1.0 \times 10^5$<br>TNT; $2.1 \times 10^4$                                                                                                  | -                 | PA = $45.8 \mu M$<br>TNT = $148.9 \mu M$ (70 % quenching) | methanol           | 3         |
| poly(silylenevinylene)                 | $8.491 \times 10^3 M^{-1}$ in THF<br>$6.36 \times 10^4 M^{-1}$ in water                                                                                     | ~ 1.0 ppm         | 94.3 mM in THF; 21.5 mM in THF/water                      | THF/water          | 4         |
| terthiophene                           | $5.7 \times 10^3$                                                                                                                                           | 70 ppb            | PA, TNT, DNT and NB                                       | Water              | 5         |
| pentacenequinone                       | PA; $6.9 \times 10^4$<br>TNT; $4.3 \times 10^3$                                                                                                             | 500 ppb           | PA, TNT, DNT and <i>p</i> -DNB;                           | THF/water          | 6         |
| <i>p</i> -phenylenevinylene            | $5.51 \times 10^4$                                                                                                                                          | 2.71 ppb          | PA TNT, DNT, NB, DNB, DNP, selective to PA and DNP        | water              | 7         |
| fluoranthene                           | $9.9 \times 10^4$                                                                                                                                           | 2-200 ppb         | only PA                                                   | Ethanol            | 8         |
| tetraphenylethylene                    | $5.7 \times 10^4$                                                                                                                                           | 1.45 ppb          | Selective to PA against TNT and DNT                       | THF/water          | 9         |
| amphiphilic cellulose                  | PA; $1.486 \times 10^3$ (in THF) & $1.02 \times 10^5$ (in H <sub>2</sub> O)<br>DNT; $2.21 \times 10^2$ (in THF)<br>$1.11 \times 10^4$ (in H <sub>2</sub> O) | -                 | PA and DNT                                                | THF or water       | 10        |
| hexa-peri-hexabenzocoronene            | $3.2 \times 10^6$ & $2.9 \times 10^6$                                                                                                                       | 0.9 ppb & 1.9 ppb | PA, DNB, TNT, DNT, <i>p</i> -NT, NB                       | THF/water          | 11        |
| <i>N</i> -acylhydrazone derivatives    | $4.93 \times 10^5$ , $3.85 \times 10^5$ ,<br>$5.12 \times 10^5$ , $3.02 \times 10^5$                                                                        | -                 | PA                                                        | DMF                | 12        |
| azine based covalent organic framework | $7.8 \times 10^5$                                                                                                                                           | -                 | PA, TNT and DNT                                           | Acetonitrile       | 13        |
| hexaphenylbenzene                      | $1.95 \times 10^5$                                                                                                                                          | 6.87 ppb          | PA, TNT, DNT and DNB                                      | THF/water          | 14        |
| triaminophenylbenzene                  | $1.2 \times 10^5$                                                                                                                                           | -                 | PA, TNT, DNT, <i>m</i> -DNB and <i>p</i> -DNB             | Acetonitrile       | 15        |
| tris-dimethylaminophenylbenzene        | $3.87 \times 10^5$                                                                                                                                          | 1.50 ppm          | PA, TNT, DNT, <i>m</i> -DNB and <i>p</i> -DNB             | Acetonitrile/water | this work |



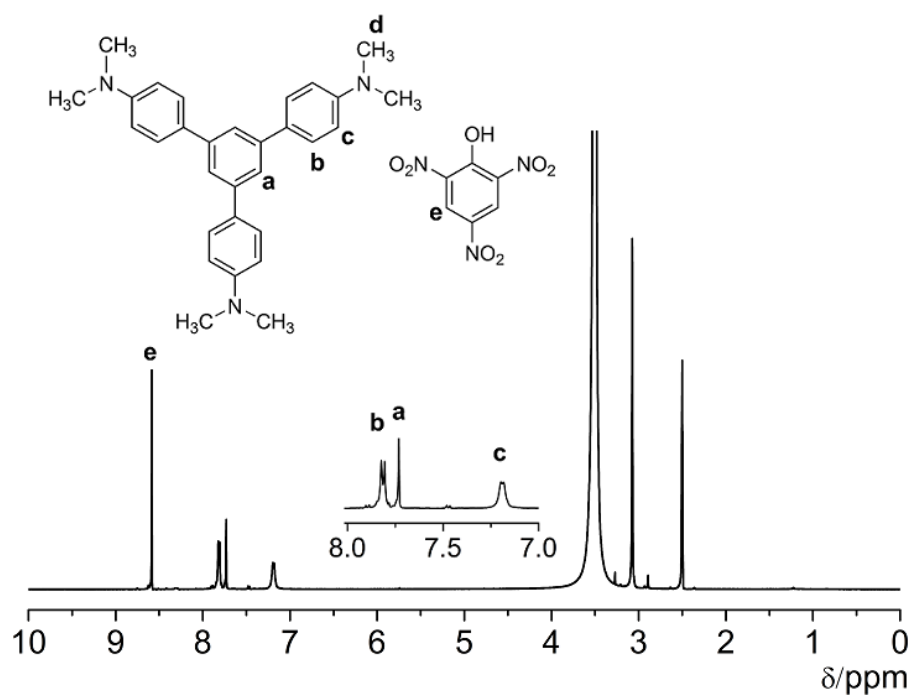

**Fig S11.**  $^1\text{H}$  NMR spectrum of  $[(N,N)\text{Me}_2]_3\text{-TAPB-PA}$  in  $\text{DMSO-}d_6$ .

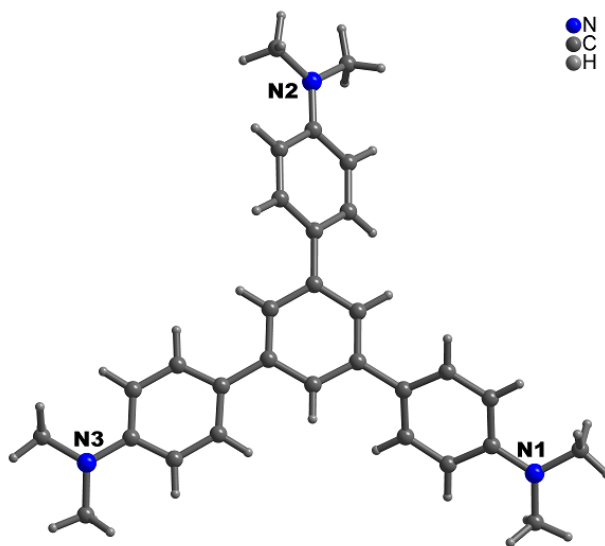

**Fig S12.** X-ray crystal structure of  $[(N,N)\text{Me}_2]_3\text{-TAPB}$ .

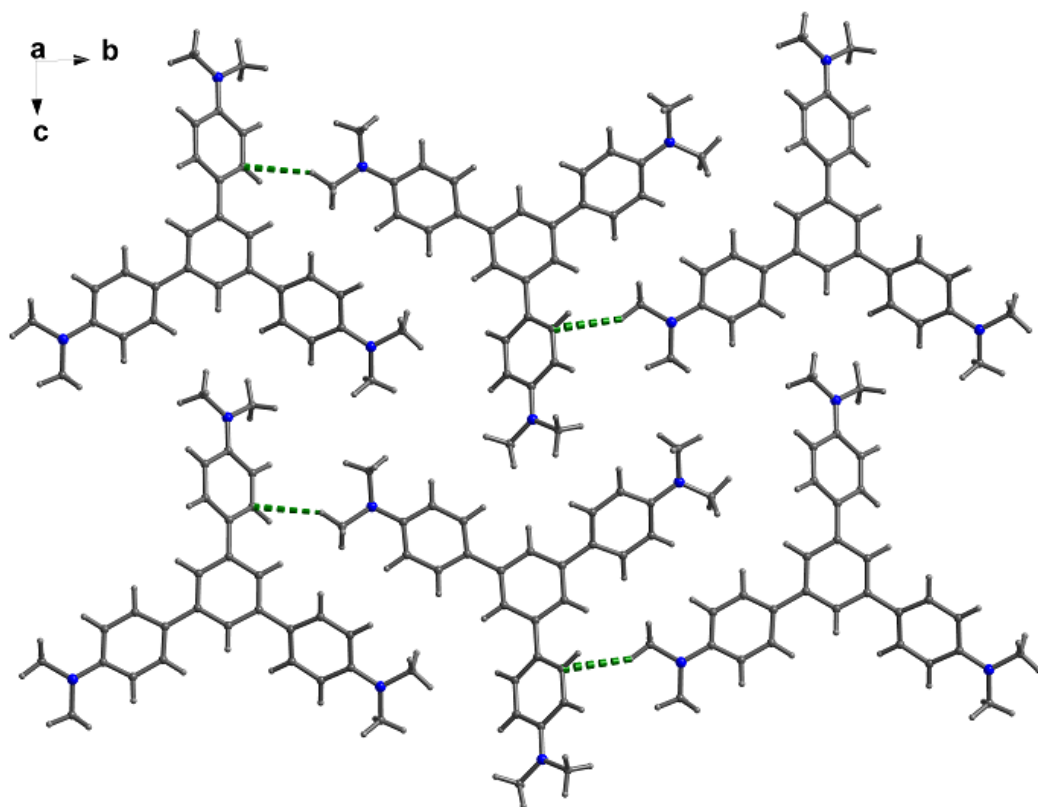

**Fig S13.** A view of a 1-D layer of the crystal structure of  $[(N,N)Me_2]_3$ -TAPB along the crystallographic direction  $a$  (H-bonds are shown by green dashed bonds).

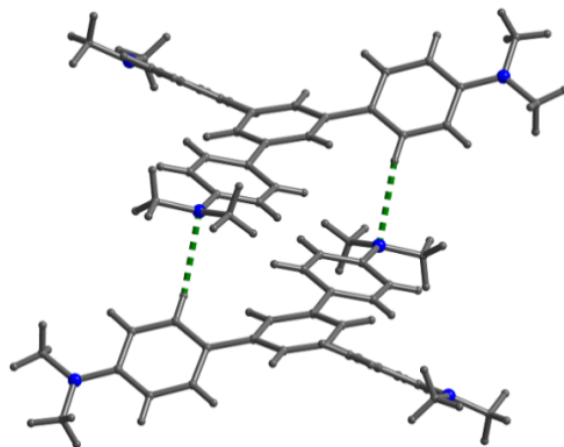

**Fig S14.** Crystal structure of  $[(N,N)Me_2]_3$ TAPB showing mutual C-H $\cdots$ N interactions between two molecules present in the adjacent layers (H-bonds are shown by green dashed bonds).

**Table S3. Crystal data and structure refinement details for[(N,N)Me<sub>2</sub>]<sub>3</sub>TAPB and[(N,N)Me<sub>2</sub>]<sub>3</sub>TAPB-PA.**

| Compound(s)                                 | [(N,N)Me <sub>2</sub> ] <sub>3</sub> TAPB      | [(N,N)Me <sub>2</sub> ] <sub>3</sub> TAPB-PA                    |
|---------------------------------------------|------------------------------------------------|-----------------------------------------------------------------|
| formula                                     | C <sub>30</sub> H <sub>33</sub> N <sub>3</sub> | C <sub>48</sub> H <sub>42</sub> N <sub>12</sub> O <sub>21</sub> |
| formula wt                                  | 435.59                                         | 1122.94                                                         |
| temperature [K]                             | 150(2)                                         | 150(2)                                                          |
| wavelength [Å]                              | 0.71075                                        | 0.71075                                                         |
| crystal system                              | monoclinic                                     | triclinic                                                       |
| space group                                 | <i>P2<sub>1</sub>/c</i>                        | <i>P-1</i>                                                      |
| a [Å]                                       | 13.508(9)                                      | 10.766(3)                                                       |
| b [Å]                                       | 24.193(16)                                     | 13.960(5)                                                       |
| c [Å]                                       | 7.507(5)                                       | 17.294(6)                                                       |
| α [deg]                                     | 90                                             | 102.357(5)                                                      |
| β [deg]                                     | 94.8640(10)                                    | 98.189(5)                                                       |
| γ [deg]                                     | 90                                             | 100.935(4)                                                      |
| volume (Å) <sup>3</sup>                     | 2444(3)                                        | 2447.0(14)                                                      |
| Z                                           | 4                                              | 2                                                               |
| density (calcd) [g/cm <sup>3</sup> ]        | 1.184                                          | 1.524                                                           |
| absorption coeff (mm <sup>-1</sup> )        | 0.069                                          | 0.122                                                           |
| <i>F</i> (000)                              | 936                                            | 1164                                                            |
| crystal size [mm <sup>3</sup> ]             | 0.02 × 0.05 × 0.25                             | 0.02 × 0.06 × 0.14                                              |
| θ range [deg]                               | 2.85 to 25.00                                  | 2.52-25.00                                                      |
| reflection collected                        | 18213                                          | 18789                                                           |
| data (Rint)                                 | 4282(0.0722)                                   | 8546(0.0354)                                                    |
| completeness to θ [%]                       | 99.7                                           | 99.1                                                            |
| restraints/parameters                       | 36/329                                         | 0/730                                                           |
| GoF on F <sup>2</sup>                       | 1.303                                          | 1.087                                                           |
| R1 [ <i>I</i> >2σ( <i>I</i> )]/all data     | 0.1283/0.1581                                  | 0.0662/0.0852                                                   |
| wR2 [ <i>I</i> >2σ( <i>I</i> )]/all data    | 0.2274/0.2450                                  | 0.1486/0.1486                                                   |
| Largest peak and hole (e, Å <sup>-3</sup> ) | 0.297, -0.229                                  | 0.331, -0.264                                                   |

**Table S4. Geometrical parameters for hydrogen bonds (distances in Å and angles in deg) of [(N,N)Me<sub>2</sub>]<sub>3</sub>TAPB and [(N,N)Me<sub>2</sub>]<sub>3</sub>TAPB-PA.**

| Compound(s)                                  | D-H···A              | d(D-H) | d(H···A) | d(D···A) | <(DHA) |
|----------------------------------------------|----------------------|--------|----------|----------|--------|
| [(N,N)Me <sub>2</sub> ] <sub>3</sub> TAPB    | C(8)-H(8)···N(3)     | 0.95   | 2.66     | 3.524(5) | 151    |
|                                              | C(29)-H(29A)···C(16) | 0.98   | 2.89     | 3.777(3) | 151    |
| [(N,N)Me <sub>2</sub> ] <sub>3</sub> TAPB-PA | N(1)-H(1W)···O(8)    | 1.01   | 1.72     | 2.724(3) | 171    |
|                                              | N(1)-H(1W)···O(9)    | 1.01   | 2.61     | 3.149(3) | 113    |
|                                              | N(2)-H(2W)···O(15)   | 1.04   | 1.71     | 2.719(3) | 161    |
|                                              | N(2)-H(2W)···O(21)   | 1.04   | 2.41     | 3.027(3) | 117    |
|                                              | N(3)-H(3W)···O(1)    | 1.00   | 1.71     | 2.697(3) | 167    |
|                                              | C(2)-H(2)···O(4)     | 0.95   | 2.49     | 3.428(4) | 171    |
|                                              | C(11)-H(11)···O(19)  | 0.95   | 2.36     | 3.234(4) | 152    |
|                                              | C(13)-H(13A)···O(9)  | 0.98   | 2.52     | 3.220(4) | 128    |
|                                              | C(13)-H(13B)···O(13) | 0.98   | 2.53     | 3.313(4) | 137    |
|                                              | C(13)-H(13C)···O(8)  | 0.98   | 2.48     | 3.400(4) | 156    |
|                                              | C(14)-H(14A)···O(20) | 0.98   | 2.58     | 3.405(5) | 149    |
|                                              | C(14)-H(14A)···O(9)  | 0.98   | 2.44     | 3.143(5) | 128    |
|                                              | C(17)-H(17)···O(15)  | 0.95   | 2.26     | 3.026(4) | 137    |
|                                              | C(21)-H(21A)···O(21) | 0.98   | 2.44     | 3.070(4) | 122    |
|                                              | C(22)-H(22B)···O(3)  | 0.98   | 2.37     | 3.129(4) | 134    |
|                                              | C(25)-H(25)···O(10)  | 0.95   | 2.40     | 3.334(4) | 166    |
|                                              | C(27)-H(27)···O(1)   | 0.95   | 2.51     | 3.219(4) | 131    |
|                                              | C(29)-H(29A)···O(2)  | 0.98   | 2.51     | 3.413(4) | 123    |
|                                              | C(30)-H(30A)···O(2)  | 0.98   | 2.34     | 3.020(4) | 126    |
|                                              | C(30)-H(30B)···O(7)  | 0.98   | 2.43     | 3.311(4) | 128    |
| C(30)-H(30B)···O(13)                         | 0.98                 | 2.38   | 3.217(4) | 144      |        |

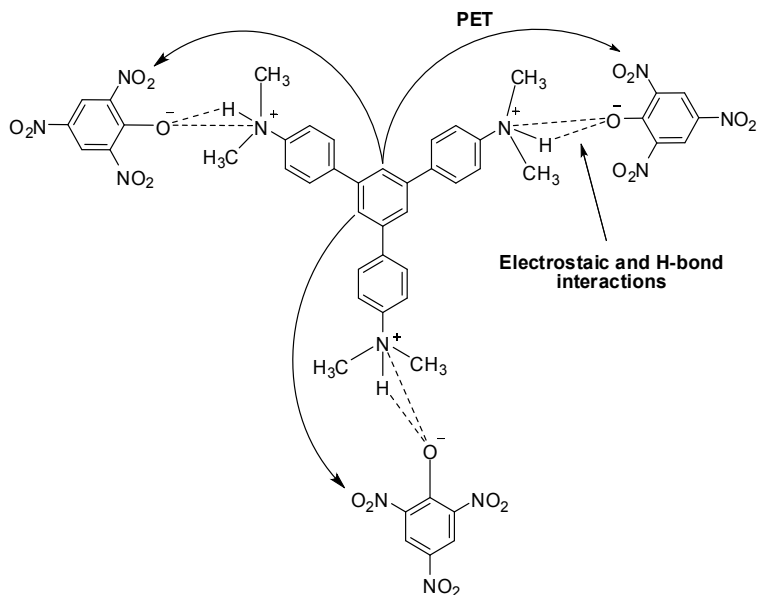

**Fig S15.** Mechanism of electrostatic and H-bonds induced PET process in the fluorophore  $[(N,N)Me_2]_3TAPB$  with PA.

**Calculation of detection limit.** To determine detection limit (DL), fluorescence titration of compound  $[(N,N)Me_2]_3TAPB$  ( $1.0 \mu M$ ) with PA has been carried out. The successive fluorescence intensities have been plotted as a function of concentration of to obtain the correlation curve which shows linear relationship with the [PA] in the range of 1.0 to 4.0  $\mu M$ . Standard deviation for blank solution (Sb1), slope of the curve (S) and signal to noise ratio ( $K$ ) = 3 have been calculated from the curve and substituted in the following equation to calculate DL.

$$DL = K \times \frac{Sb1}{S}$$

Results of the analysis are as follows:

Sb1 = 278.090, S =  $123.3428 \times 10^6$  and DL =  $6.76 \times 10^{-6} M$  or 1.50 ppm.

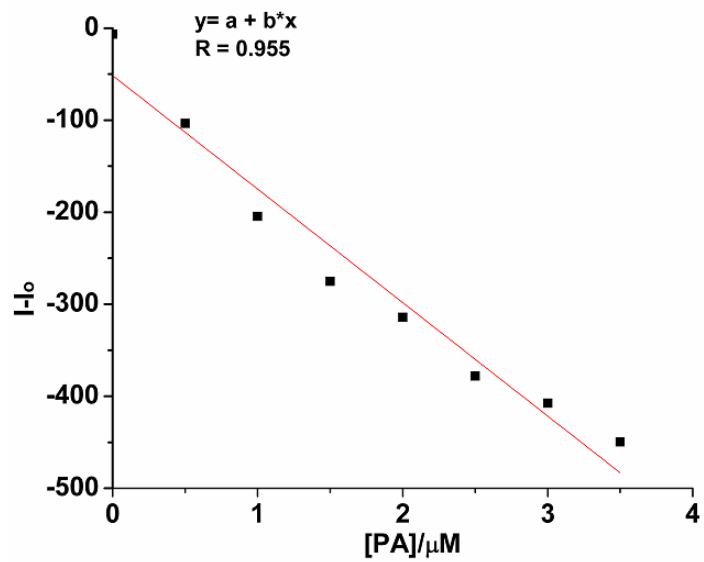

**Fig S16.** Linear correlation curve for the calculation of DL (fluorescence intensity at 427 nm versus concentration).

## References;

- (1) G. He, H. Peng, T. Liu, M. Yang, Y. Zhang and Y. Fang, *J. Mater. Chem.*, 2009, **19**, 7347-7353.
- (2) D. Li, J. Liu, R. T. K. Kwok, Z. Liang, B. Z. Tang and J. Yu, *Chem. Commun.*, 2012, **48**, 7167-7169.
- (3) M. Wang, V. Vajpayee, S. Shanmugaraju, Y.-R. Zheng, Z. Zhao, H. Kim, P. S. Mukherjee, K.-W. Chi and P. J. Stang, *Inorg. Chem.*, 2011, **50**, 1506-1512.
- (4) P. Lu, J. W. Y. Lam, J. Liu, C. K. W. Jim, W. Yuan, N. Xie, Y. Zhong, Q. Hu, K. S. Wong, K. K. L. Cheuk and B. Z. Tang, *Macromol. Rapid Commun.*, 2010, **31**, 834-839.
- (5) T. Liu, L. Ding, G. He, Y. Yang, W. Wang and Y. Fang, *ACS Appl. Mater. Interfaces*, 2011, **3**, 1245-1253.
- (6) V. Bhalla, A. Gupta and M. Kumar, *Org. Lett.*, 2012, **14**, 3112-3115.
- (7) N. Dey, S. K. Samanta and S. Bhattacharya, *ACS Appl. Mater. Interfaces*, 2013, **5**, 8394-8400.
- (8) N. Venkatramaiah, S. Kumar and S. Patil, *Chem. Commun.*, 2012, **48**, 5007-5009.
- (9) H.-T. Feng and Y.-S. Zheng, *Chem. Eur. J.*, 2013, **20**, 195-201.
- (10) X. Wang, Y. Guo, D. Li and H. Chen and R.-c. Sun, *Chem. Commun.*, 2012, **48**, 5569-5571.
- (11) V. Vij, V. Bhalla, and M. Kumar, *ACS Appl. Mater. Interfaces*, 2013, **5**, 5373-5380.
- (12) M. Dong, Y.-W. Wang, A.-J. Zhang and Y. Peng *Chem. Asian J.* 2013, **8**, 1321-1330.
- (13) S. Dalapati, S. Jin, J. Gao, Y. Xu, A. Nagai and D. Jiang, *J. Am. Chem. Soc.* 2013, **135**, 17310-17313.
- (14) V. Bhalla; S. Kaur, V. Vij and M. Kumar *Inorg. Chem.* 2013, **52**, 4860-4865.
- (15) P. Vishnoi, M. G. Walawalkar, S. Sen, A. Datta, G. N. Patwari and R. Murugavel, *Phys. Chem. Chem. Phys.* 2014, **16**, 10651-10658.
